# Supplementary material for: A Recyclable Co-Fe Bimetallic Immobilized Cellulose Hydrogel Bead (CoFeO@CHB) to Boost Singlet Oxygen Evolution for Tetracycline Degradation
Source: MDPI journal article supplement (doi:10.3390/catal13081150), 2023-07-25
Supplement: s1 [file s1]

Supporting Information

Table S1. Determination of TC degradation products in the CoFeO@CHB/PMS system.

| Compound | ESI mode (+/-) | m/z       | Molecular formula                                             | Possible structure                                                                 | Retention time (min) |
|----------|----------------|-----------|---------------------------------------------------------------|------------------------------------------------------------------------------------|----------------------|
| TC       | ESI+           | 445.16054 | C <sub>22</sub> H <sub>24</sub> O <sub>8</sub> N <sub>2</sub> | 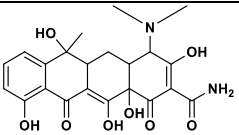 | 1.43                 |
| TC1      | ESI+           | 461.15546 | C <sub>22</sub> H <sub>24</sub> N <sub>2</sub> O <sub>9</sub> |                                                                                    | 0.86                 |
| TC2      | ESI+           | 433.16054 | C <sub>21</sub> H <sub>24</sub> O <sub>8</sub> N <sub>2</sub> |                                                                                    | 1.10                 |
| TC3      | ESI+           | 427.14998 | C <sub>22</sub> H <sub>22</sub> O <sub>7</sub> N <sub>2</sub> |                                                                                    | 1.45                 |
| TC4      | ESI+           | 406.14964 | C <sub>20</sub> H <sub>23</sub> NO <sub>8</sub>               |                                                                                    | 1.60                 |
| TC5      | ESI+           | 404.13399 | C <sub>20</sub> H <sub>21</sub> NO <sub>8</sub>               |                                                                                    | 1.88                 |
| TC6      | ESI+           | 366.15473 | C <sub>18</sub> H <sub>22</sub> NO <sub>7</sub>               |                                                                                    | 1.41                 |
| TC7      | ESI+           | 365.08671 | C <sub>17</sub> H <sub>16</sub> NO <sub>9</sub>               |                                                                                    | 1.37                 |
| TC8      | ESI+           | 365.08671 | C <sub>17</sub> H <sub>16</sub> NO <sub>9</sub>               |                                                                                    | 1.37                 |
| TC9      | ESI-           | 329.06558 | C <sub>17</sub> H <sub>12</sub> O <sub>7</sub>                |                                                                                    | 1.92                 |
| TC10     | ESI-           | 317.06558 | C <sub>16</sub> H <sub>14</sub> O <sub>7</sub>                |                                                                                    | 1.89                 |
| TC11     | ESI+           | 301.07066 | C <sub>16</sub> H <sub>12</sub> O <sub>6</sub>                |                                                                                    | 1.66                 |

|      |      |           |                                               |                                                                                     |      |
|------|------|-----------|-----------------------------------------------|-------------------------------------------------------------------------------------|------|
| TC12 | ESI+ | 205.04954 | C <sub>11</sub> H <sub>8</sub> O <sub>4</sub> | 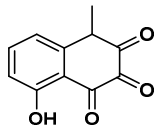 | 0.84 |
| TC13 | ESI+ | 139.03897 | C <sub>7</sub> H <sub>6</sub> O <sub>3</sub>  |  | 0.57 |
| TC14 | ESI+ | 127.03897 | C <sub>6</sub> H <sub>6</sub> O <sub>3</sub>  |  | 0.31 |

Table S2. Literature summary of TC degradation by different catalysts/PMS systems.

| Catalyst                                                   | Synthesis method                      | Reaction conditions                                                                                                                     | Performance                                                         | Ref.      |
|------------------------------------------------------------|---------------------------------------|-----------------------------------------------------------------------------------------------------------------------------------------|---------------------------------------------------------------------|-----------|
| Fe@C-S                                                     | Pyrolysis-sulfidation                 | TC = 20 mg L <sup>-1</sup> ; catalyst = 0.1 g L <sup>-1</sup> ; PMS = 0.25 mM; pH = 5.0                                                 | 91.2% removal in 40 min with a <i>k</i> of 0.2038 min <sup>-1</sup> | [48]      |
| Co-ZIF-(Fe) <sub>0.5</sub>                                 | Chemical precipitation                | TC = 30 mg L <sup>-1</sup> ; catalyst = 0.2 g L <sup>-1</sup> ; PMS = 0.3 g L <sup>-1</sup> ; pH = 4.21                                 | 96.71% removal in 5 min                                             | [49]      |
| CoFe <sub>2</sub> O <sub>4</sub> /montmorillonite          | Hydrothermal                          | TC = 50 mg L <sup>-1</sup> ; catalyst = 0.025 g L <sup>-1</sup> ; PMS = 0.5 mM; pH = 3                                                  | ~100% removal in 30 min with a <i>k</i> of 0.178 min <sup>-1</sup>  | [11]      |
| CoFe/Nickel                                                | Hydrothermal followed by calcination  | TC = 0.1 mM; PMS = 0.5 mM; pH = 7                                                                                                       | 80% removal in 60 min with a <i>k</i> of 0.049 min <sup>-1</sup>    | [50]      |
| FeCo-LDH                                                   | Precipitation                         | TC = 30 mg L <sup>-1</sup> ; catalyst = 0.2 g L <sup>-1</sup> ; PMS = 0.25 g L <sup>-1</sup>                                            | 92% removal in 5 min                                                | [51]      |
| Mn <sub>0.85</sub> Fe <sub>2.15</sub> O <sub>4</sub> -CNTs | Hydrothermal followed by calcination  | TC = 20 mg L <sup>-1</sup> ; catalyst = 0.4 g L <sup>-1</sup> ; PMS = 0.8 mM; pH = 6.8                                                  | 90% removal in 60 min with a <i>k</i> of 0.0731 min <sup>-1</sup>   | [46]      |
| Fe-doped CoTiO <sub>3</sub>                                | Precipitation followed by calcination | TC = 20 mg L <sup>-1</sup> ; catalyst = 0.1 g L <sup>-1</sup> ; PMS = 1.0 mM; pH = 7.0                                                  | 99% removal in 40 min with a <i>k</i> of 0.0986 min <sup>-1</sup>   | [52]      |
| FeCo <sub>x</sub>                                          | Coprecipitation                       | TC = 0.0225 mM; catalyst = 0.3 g L <sup>-1</sup> ; PMS = 0.5 mM; pH = 6.35 ± 0.1                                                        | 95.4% removal in 10 min                                             | [53]      |
| Fe-N/C                                                     | Carbonization                         | TC = 30 mg L <sup>-1</sup> ; catalyst = 0.05 g L <sup>-1</sup> ; PMS = 0.5 g L <sup>-1</sup>                                            | 89.2% removal in 20 min                                             | [54]      |
| CoFeO@CHB                                                  | Precipitation - calcination           | TC = 10 mg L <sup>-1</sup> ; catalyst = 1.15 g L <sup>-1</sup> (~0.02 g L <sup>-1</sup> when CHB was excluded); PMS = 0.4 mM; pH = 6.36 | 76% removal in 120 min with a <i>k</i> of 0.014 min <sup>-1</sup>   | This work |

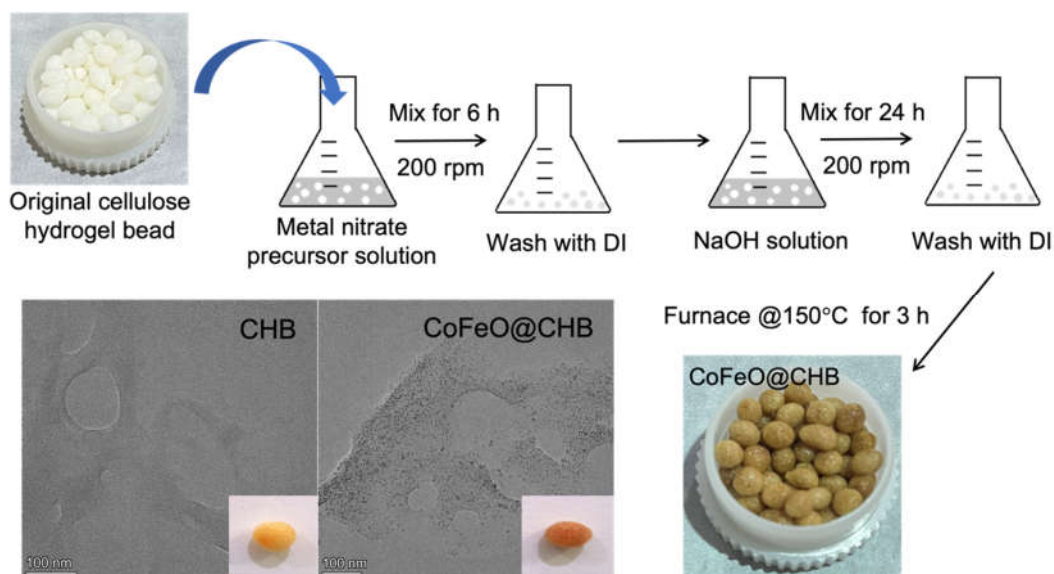

**Figure S1.** Synthesis and TEM images of as-prepared CHB and CoFeO@CHB.

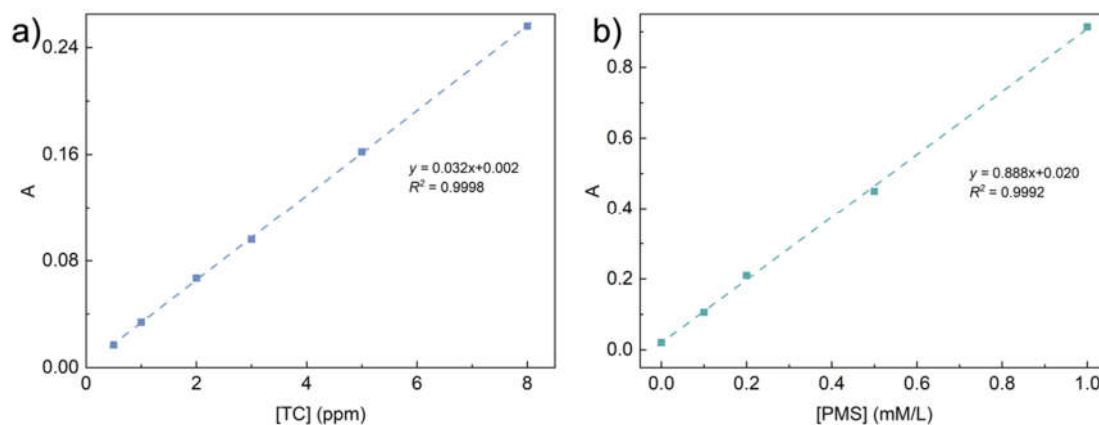

**Figure S2.** Standard curves for TC (a) and PMS (b).

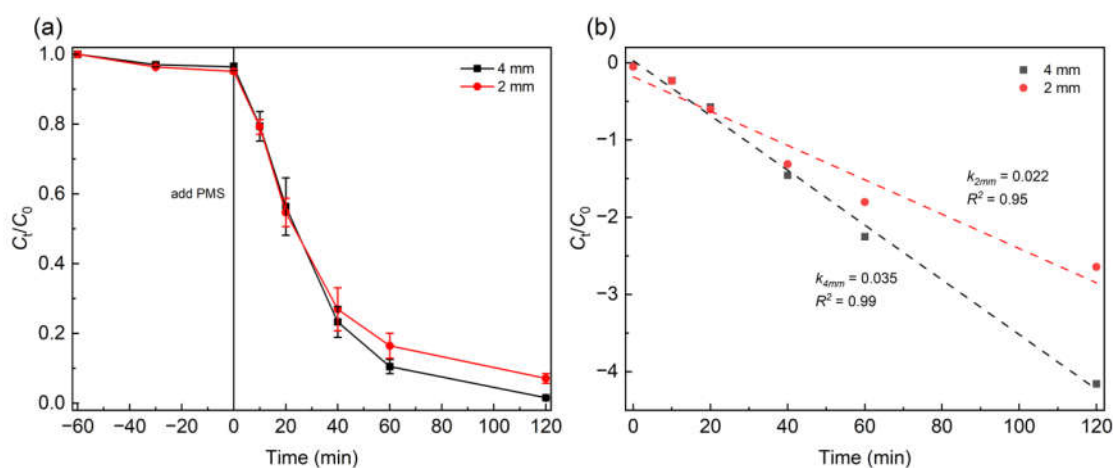

**Figure S3.** Effects of hydrogel beads diameter on TC degradation (cobalt was loaded into the substrates).

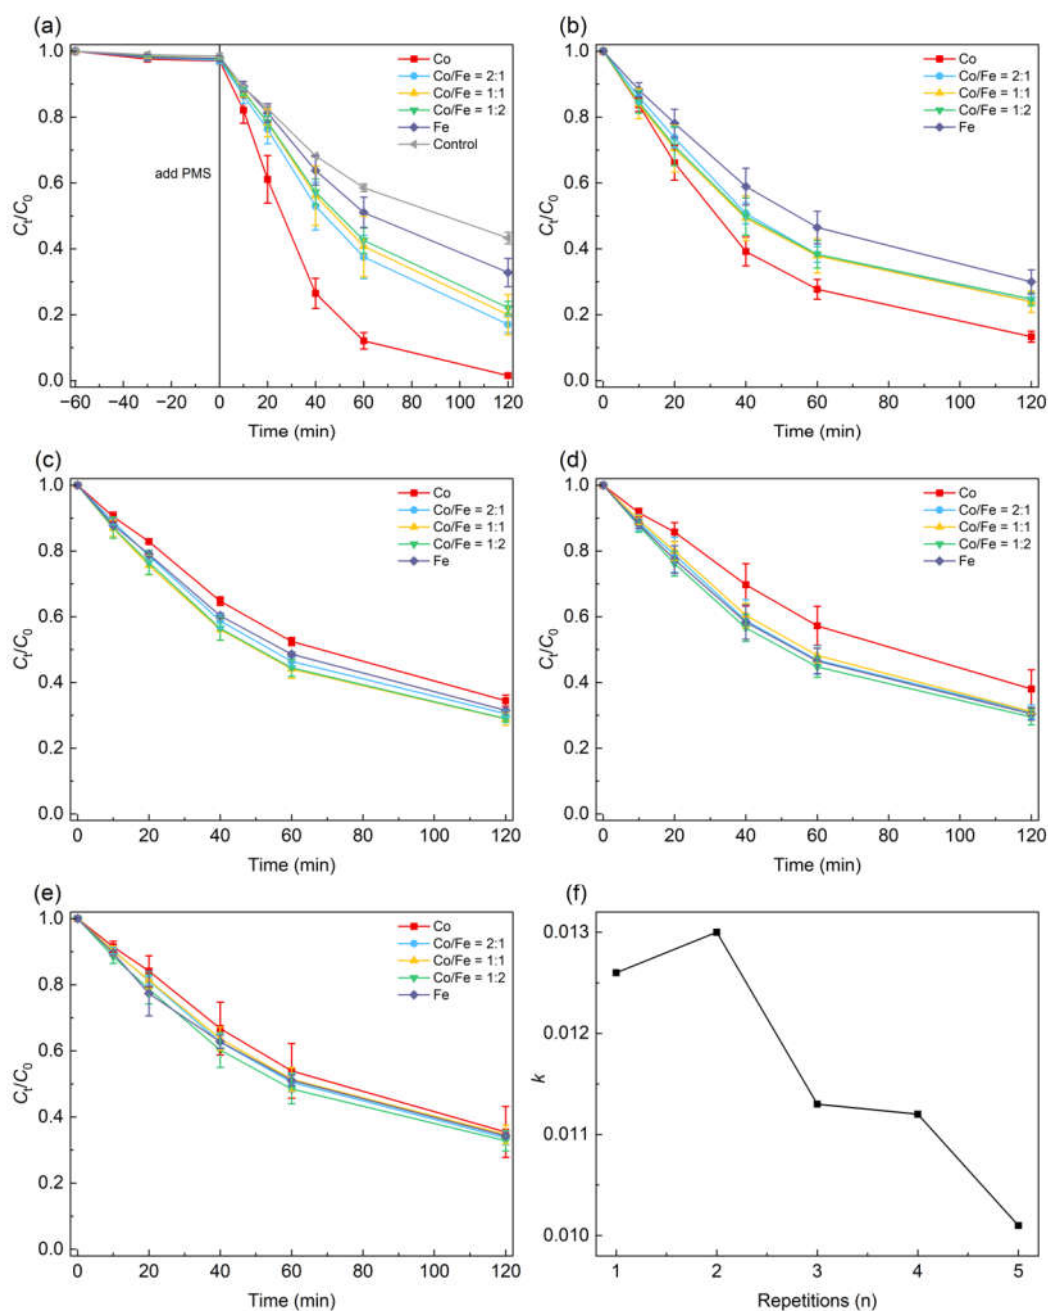

**Figure S4.** Degradation of TC by the (a) first usage, (b) second usage, (c) third usage, (d) fourth usage, (e) fifth usage of catalysts with different Co/Fe ratios and (f) effect of repetition times on reaction rate constants. (Conditions: [TC] = 10 mg L<sup>-1</sup>, [PMS] = 40 mmol L<sup>-1</sup>, [Catalyst] = 1.15 g/L, catalyst prepared without heat treatment).

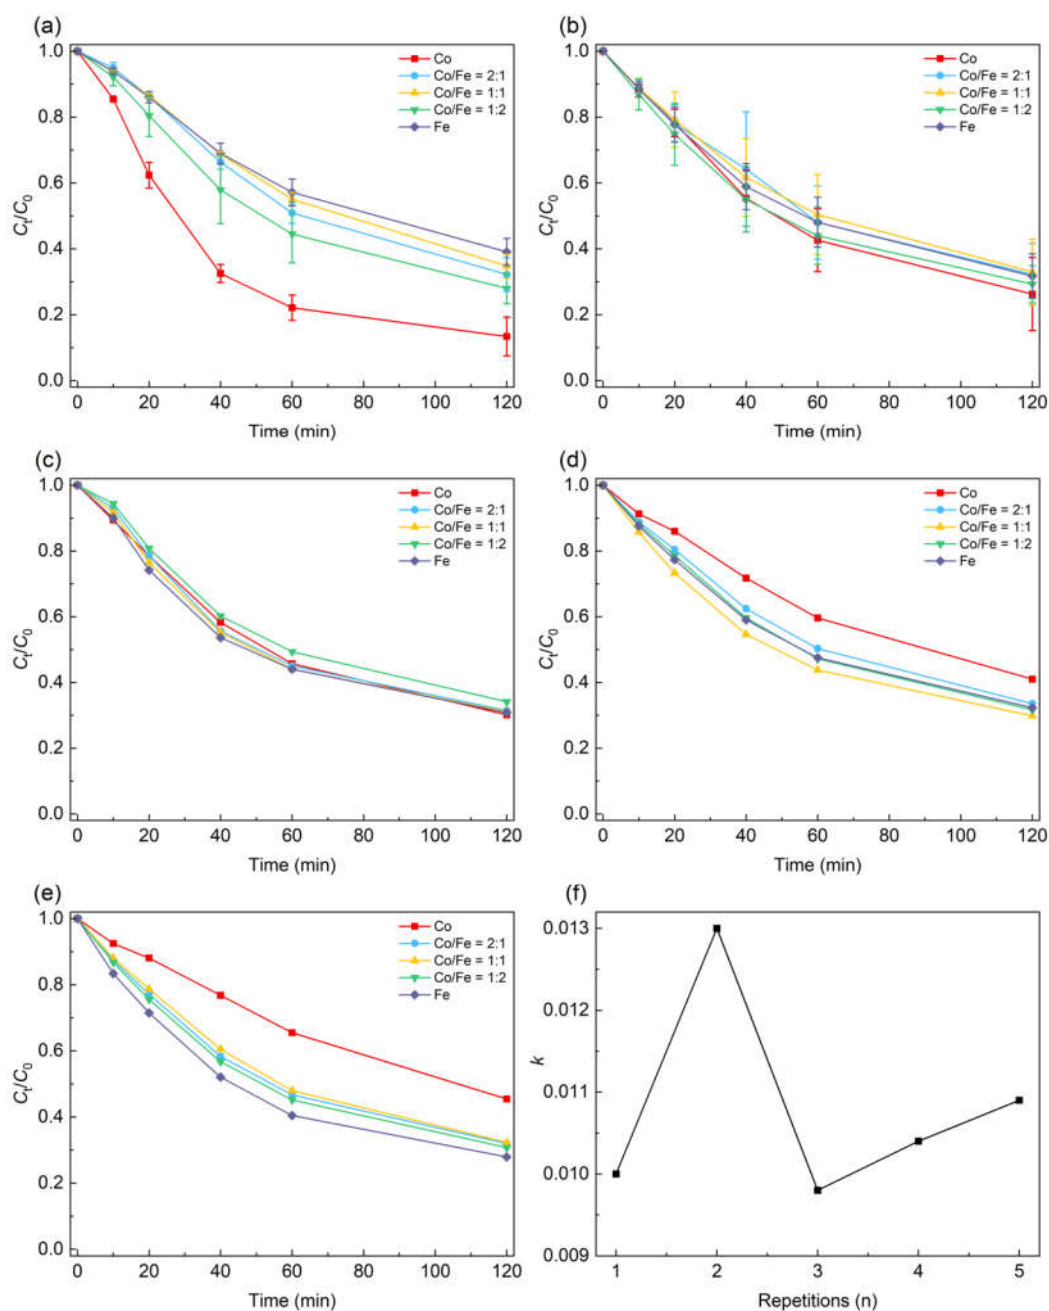

**Figure S5.** Degradation of TC by the (a) first usage, (b) second usage, (c) third usage, (d) fourth usage, (e) fifth usage of catalysts with different Co/Fe ratios and (f) effect of repetition times on reaction rate constants. (Conditions: [TC] = 10 mg L<sup>-1</sup>, [PMS] = 40 mmol L<sup>-1</sup>, [Catalyst] = 1.15 g/L, catalyst prepared with heat treatment).

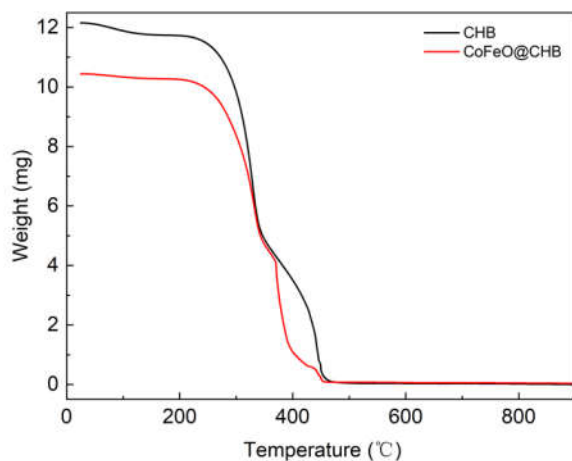

Figure S6. TGA of both CHB and CoFeO@CHB.

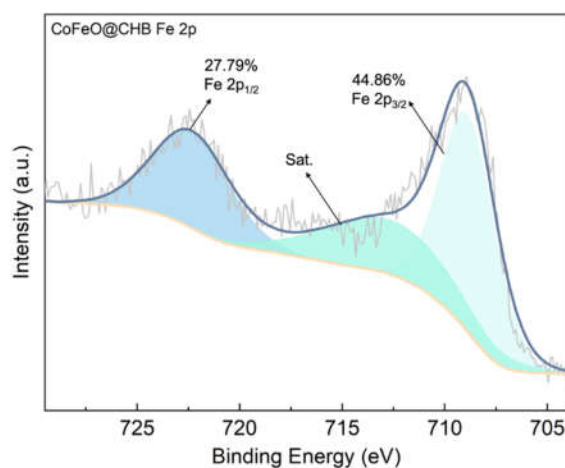

Figure S7. High resolution of Fe 2p spectra in CoFeO@CHB.

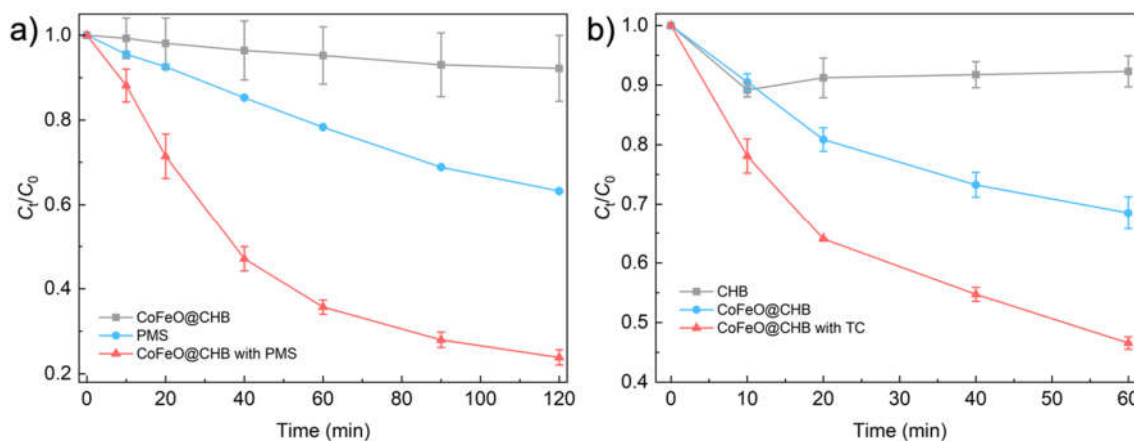

Figure S8. a) TC degradation in different systems (CoFeO@CHB = 1.15 g L<sup>-1</sup>, PMS = 0.4 mM, pH = 6.36) and b) PMS decomposition in different systems.

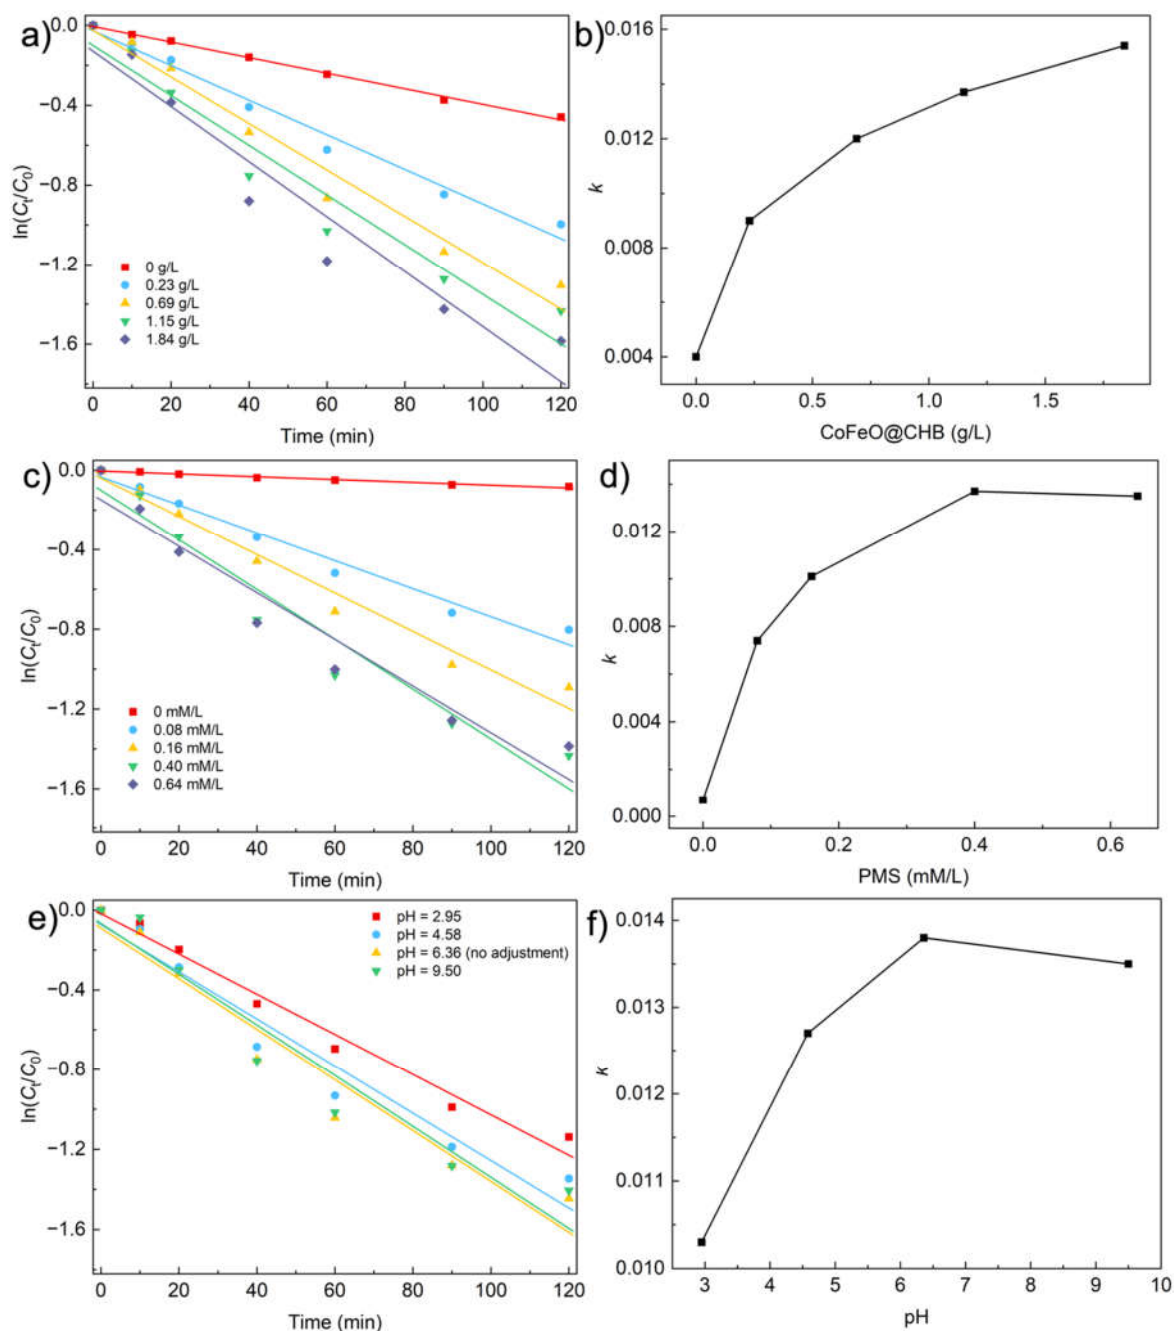

**Figure S9.** The pseudo-first-order kinetic plots for TC degradation and the calculated rate constant under different reaction conditions.

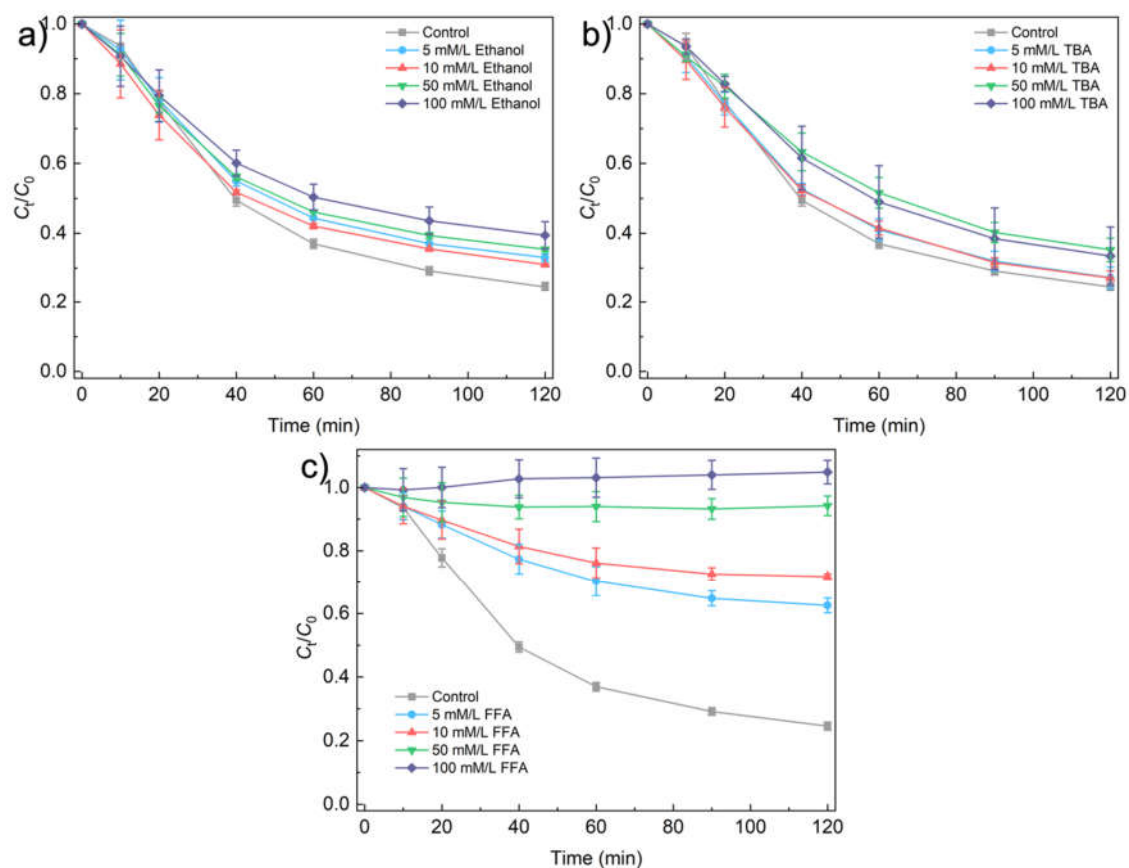

**Figure S10.** Effects of different scavengers on TC degradation in the CoFeO@CHB/PMS system (Conditions:  $[TC_0] = 10 \text{ mg} \cdot \text{L}^{-1}$ ,  $[PMS] = 40 \text{ mmol} \cdot \text{L}^{-1}$ ,  $[CoFeO@CHB] = 1.15 \text{ g} \cdot \text{L}^{-1}$ ,  $[pH] = 6.36$ ).



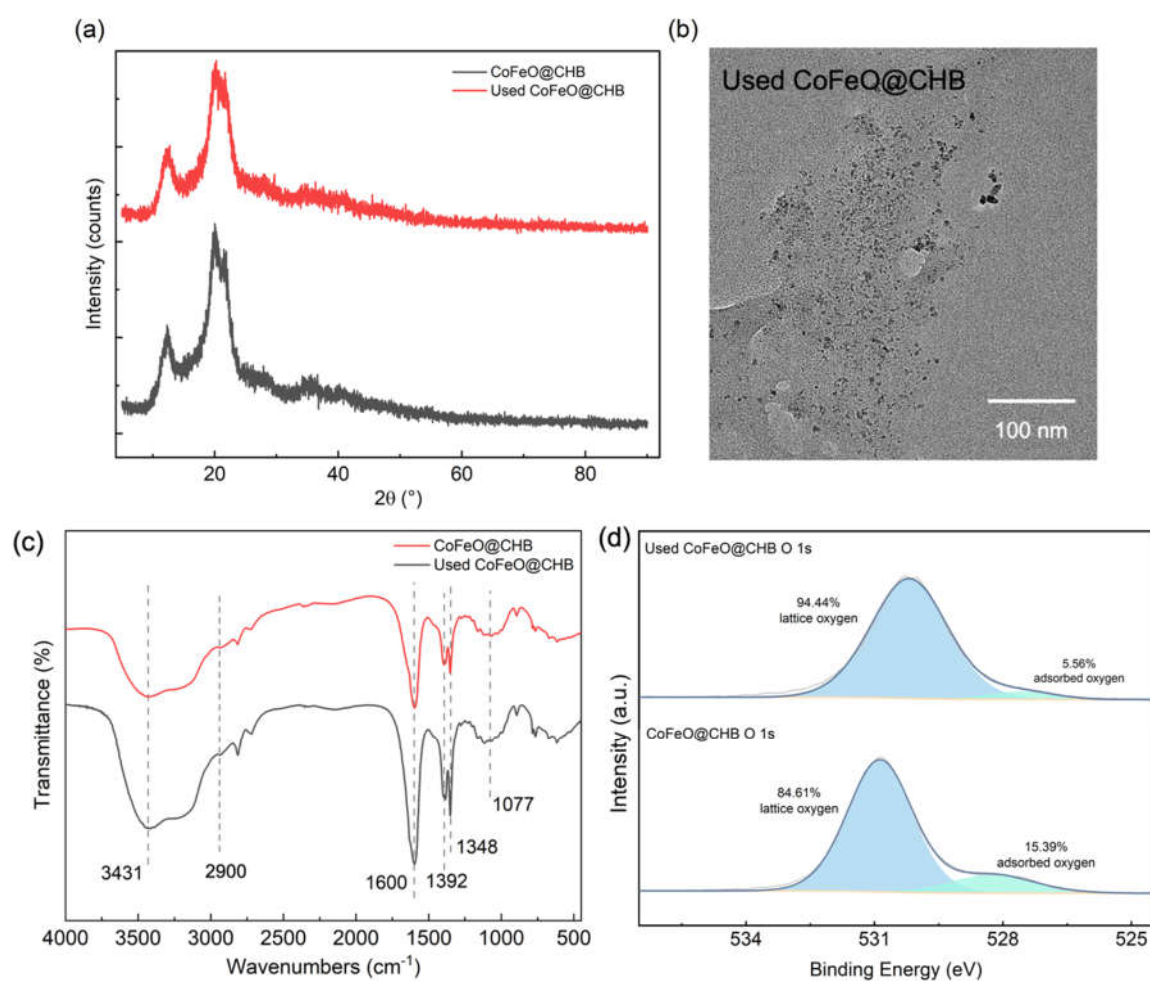

**Figure S11.** The XRD patterns of fresh and used CoFeO@CHB (a), TEM images of Used CoFeO@CHB (b), FTIR analysis of fresh and used CoFeO@CHB (c) and high resolution of O1s in fresh and used CoFeO@CHB (d).

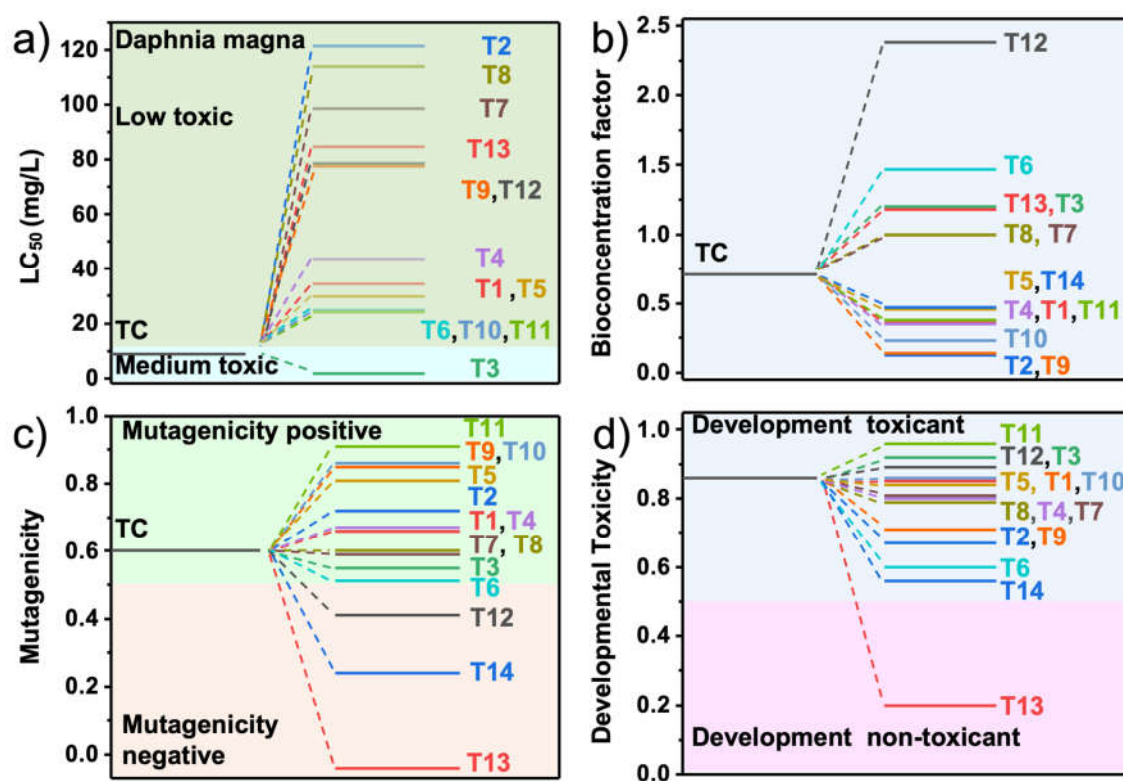

**Figure S12.** The toxicity evaluation of TC and its degradation products in the CoFeO@CHB/PMS system.

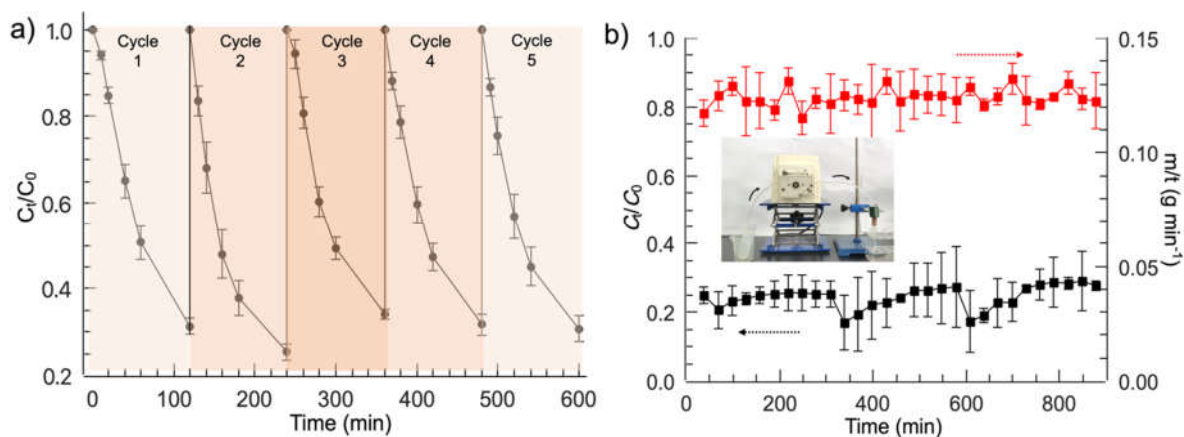

**Figure S13.** The reusability and stability test of CoFeO@CHB/PMS system for TC degradation in a batch (a) and continuous system (b).
