# Supplementary material for: A Recyclable Co-Fe Bimetallic Immobilized Cellulose Hydrogel Bead (CoFeO@CHB) to Boost Singlet Oxygen Evolution for Tetracycline Degradation
Source: MDPI journal article supplement (doi:10.3390/catal13081150), 2023-07-25
Supplement: s1 [file s1]

Archive with 1 entries (1 files):
- catalysts-2502363-supplementary.pdf
